# Supplementary material for: Nanozymatic magnetic nanomotors for enhancing photothermal therapy and targeting intracellular SERS sensing
Source: Royal Society of Chemistry journal article supplement (doi:10.1039/d3nr02739b), 2023-01-01
Supplement: d3nr02739b1.pdf [file d3nr02739b1.pdf]

## Supporting Information

Nanozymatic Magnetic Nanomotors for Enhancing Photothermal  
Therapy and Targeting Intracellular SERS Sensing

*Shimi Liu,<sup>a,b,#</sup> Dandan Xu,<sup>a,b,#,\*</sup> Junling Chen,<sup>a,b</sup> Na Peng,<sup>a</sup> Tao Ma,<sup>a,b</sup> and Feng  
Liang<sup>a,b,\*</sup>*

<sup>a</sup> The State Key Laboratory of Refractories and Metallurgy, School of Chemistry and  
Chemical Engineering, Wuhan University of Science and Technology, Wuhan  
430081, China

<sup>b</sup> Improve-WUST Joint Laboratory of Advanced Technology for Point-of-Care  
Testing and Precision Medicine, Wuhan University of Science and Technology,  
Wuhan 430081, China

<sup>#</sup> These authors contributed equally to this work.

<sup>\*</sup> E-mail: xudandan@whu.edu.cn; feng\_liang@whu.edu.cn

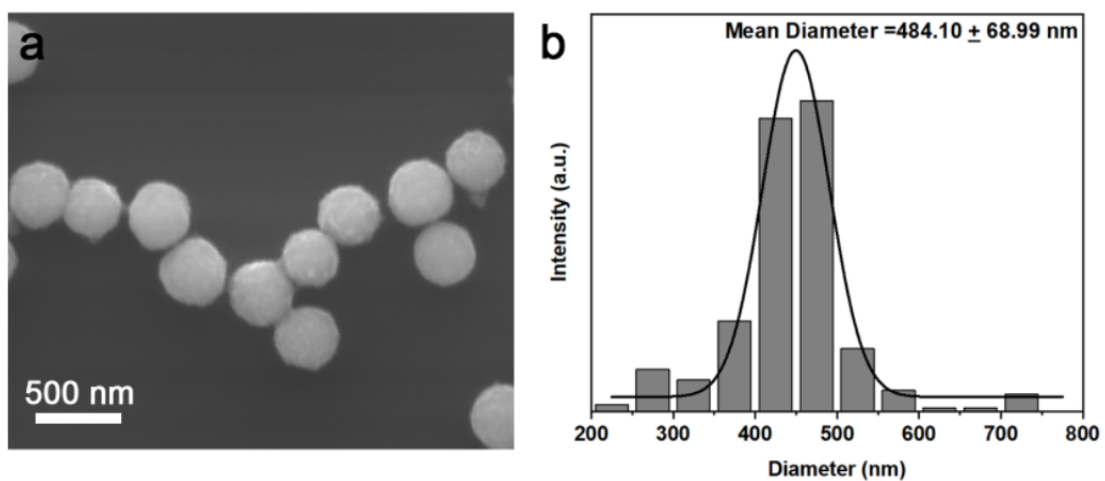

**Figure S1.** (a) SEM image and (b) size distribution of  $\text{Fe}_3\text{O}_4$ .

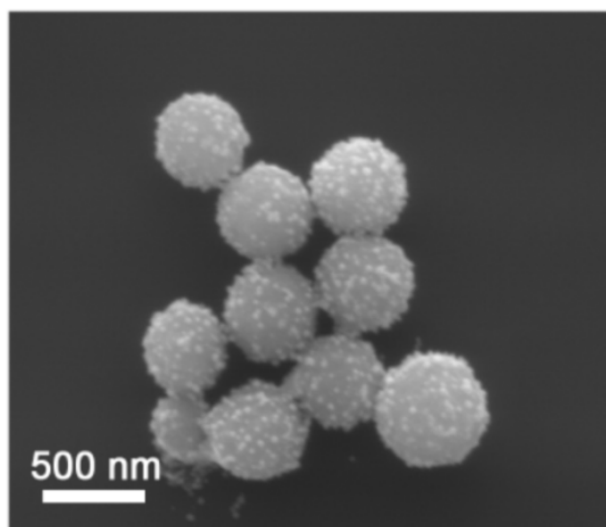

**Figure S2.** SEM image of MAuNP.

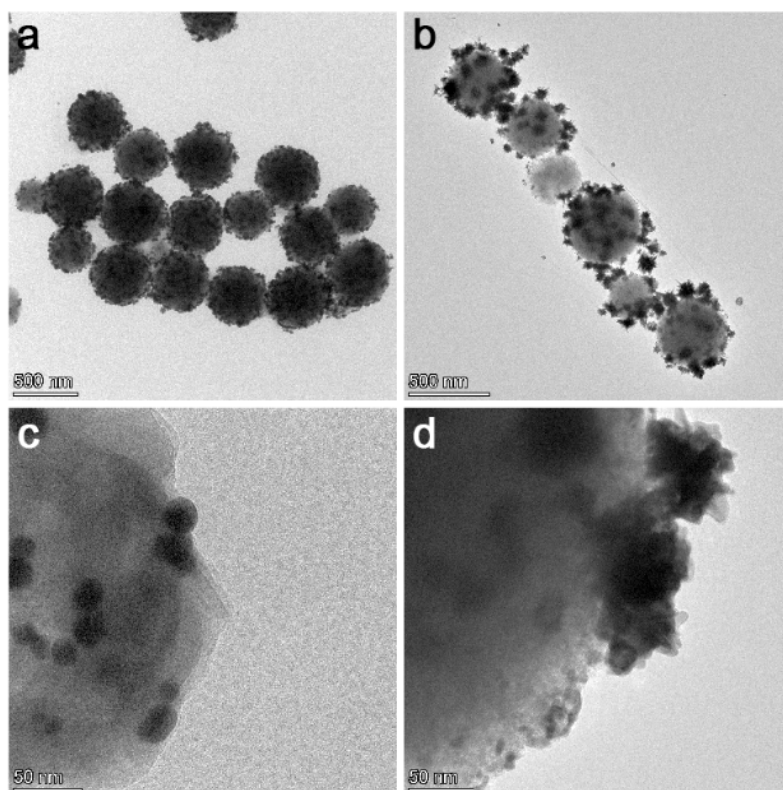

**Figure S3.** (a) and (c) TEM images of MAuNP with different magnifications. (b) TEM images of MAuNS with different magnifications.

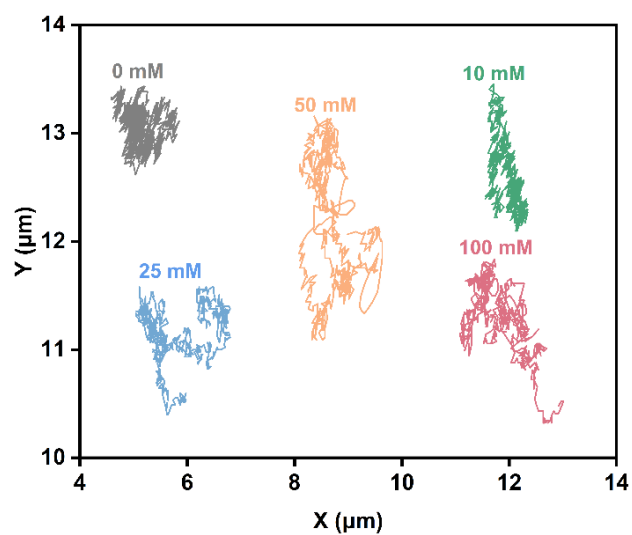

**Figure S4.** Representative tracking trajectories of MAuNS nanomotors swimming in glucose solution with different concentrations during 30 s

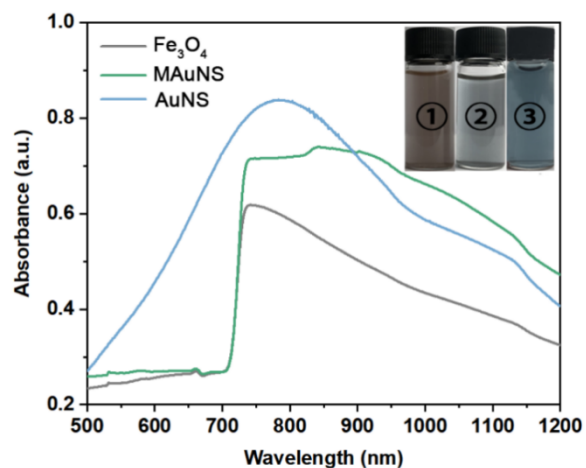

**Figure S5.** UV-vis absorption spectra of  $\text{Fe}_3\text{O}_4$ , MAuNS, and AuNS. Inset: pictures of  $\text{Fe}_3\text{O}_4$  (①), MAuNS (②), and AuNS (③) solutions.

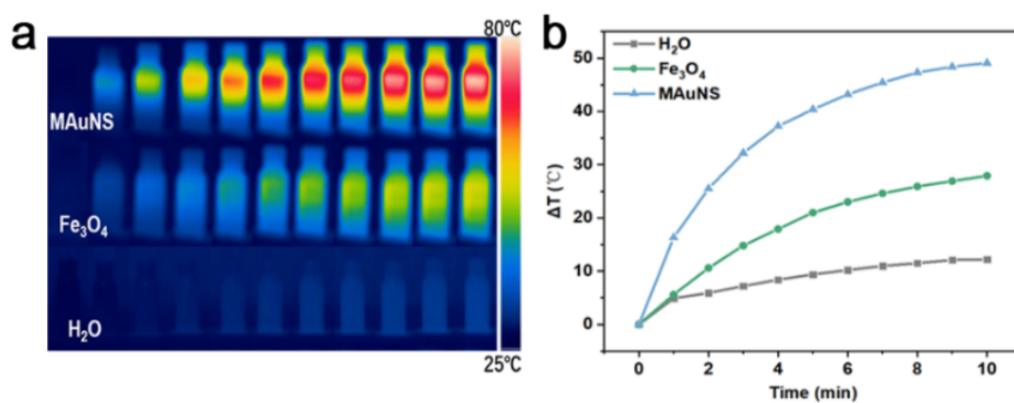

**Figure S6.** Photothermal responding (a) image and (b) curves of  $\text{Fe}_3\text{O}_4$ , MAuNS and MAuNS with the concentration of  $0.10 \text{ mg mL}^{-1}$  ( $808 \text{ nm}$ ,  $1.5 \text{ W cm}^{-2}$ ,  $10 \text{ min}$ ).

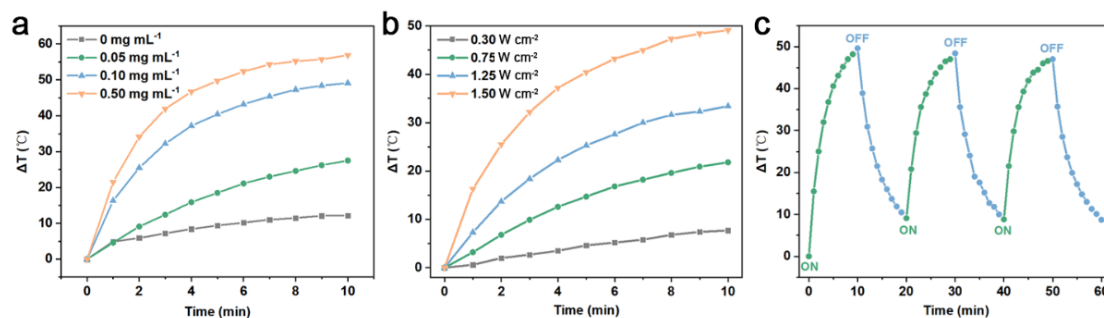

**Figure S7.** (a) Photothermal responds of MAuNS suspension with different concentrations upon NIR laser irradiation with the power density of  $1.5 \text{ W cm}^{-2}$  and (b) that of  $0.1 \text{ mg mL}^{-1}$  of MAuNS suspension upon NIR laser irradiation with different power densities. (c) Photothermal responses of MAuNS suspension for three cycles upon NIR laser irradiation ( $808 \text{ nm}$ ,  $1.5 \text{ W cm}^{-2}$ ,  $0.10 \text{ mg mL}^{-1}$ ).

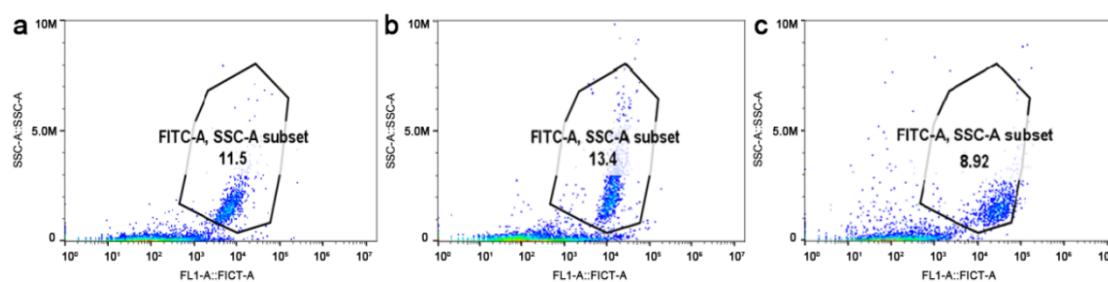

**Figure S8.** Scatter plots of blank HeLa cells (control) and cells after incubated with MAuNS+glucose ( $0 \text{ mM}$ ) and MAuNS+glucose ( $50 \text{ mM}$ ) determined by flow cytometry.

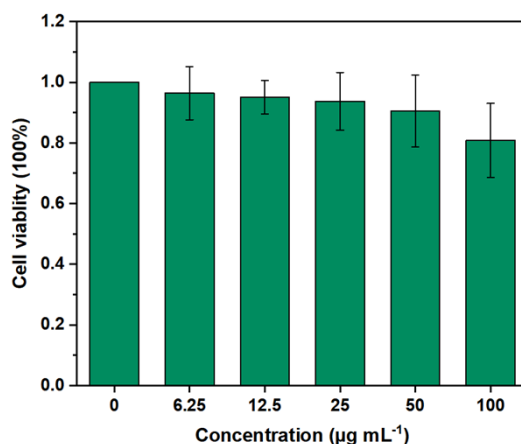

**Figure S9.** Cell viability of MCF 10A cells after incubated with the nanomotors for 24 h in dark.

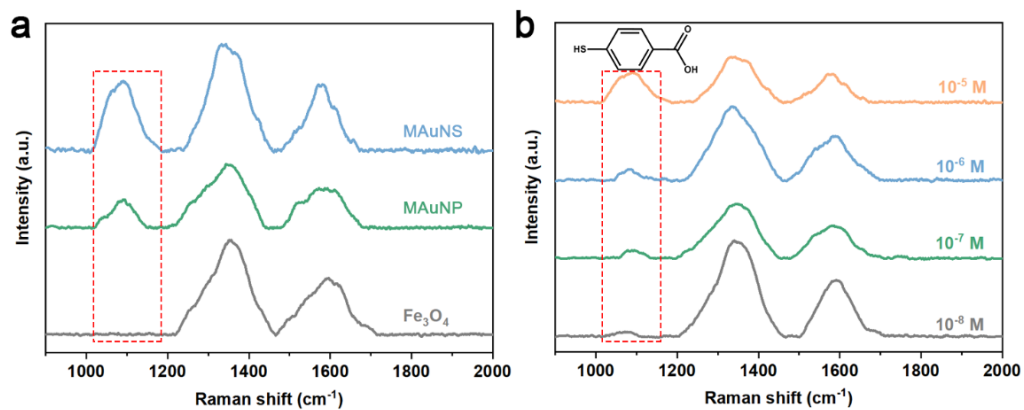

**Figure S10.** (a) SERS spectra of 4-MBA ( $10^{-5}$  M) using  $\text{Fe}_3\text{O}_4$ , MAuNP and MAuNS as SERS probes, respectively. (b) Raman spectra of 4-MBA with different concentrations using MAuNS as SERS probe.

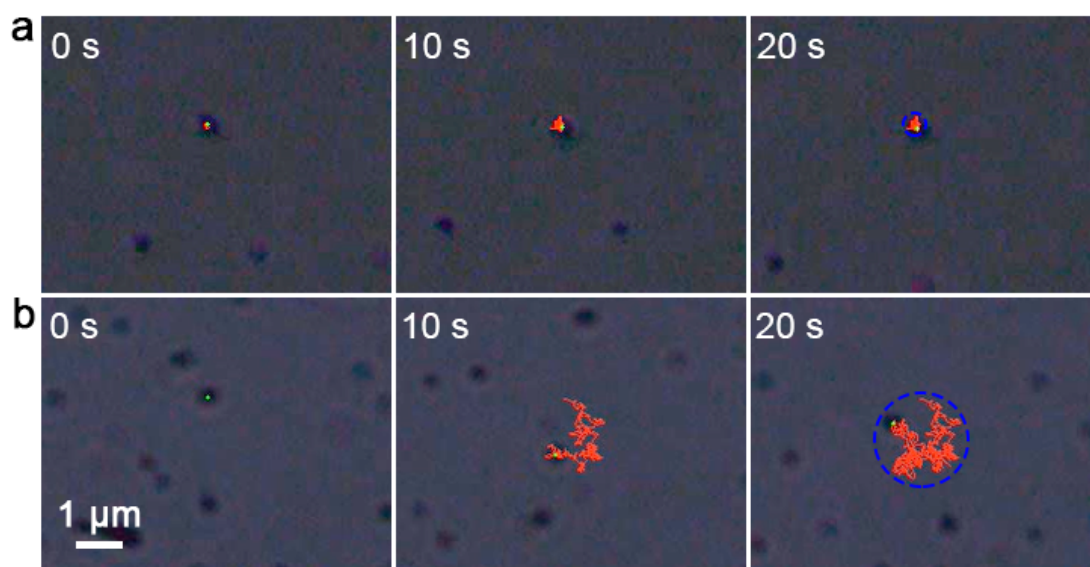

**Figure S11.** Video snapshots of a MAuNS nanomotor when the oscillating magnetic field is (a) on and (b) off.

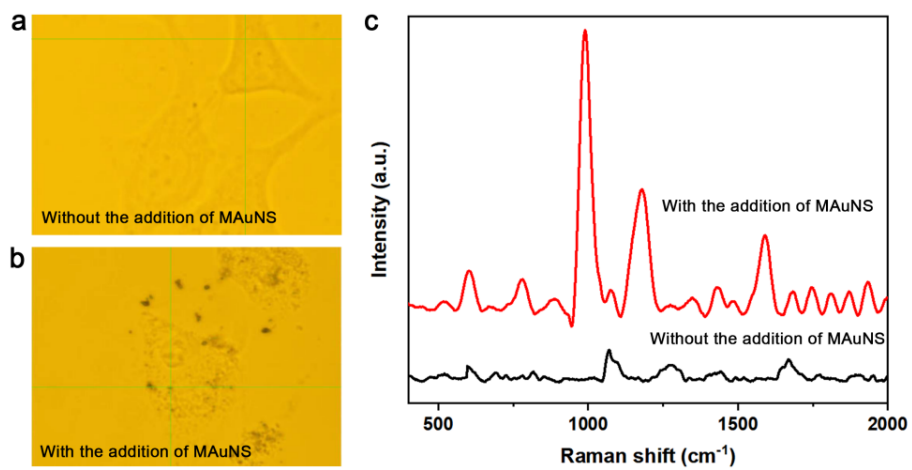

**Figure S12.** Micrographs and Raman spectra of HeLa cell without and with the addition of MAuNS.
